# Supplementary material
Source: PubMed Central journal article supplement (PMC9096898)
Supplement: NIHMS1800997-supplement-Supplementary_Material.pdf [file NIHMS1800997-supplement-Supplementary_Material.pdf]

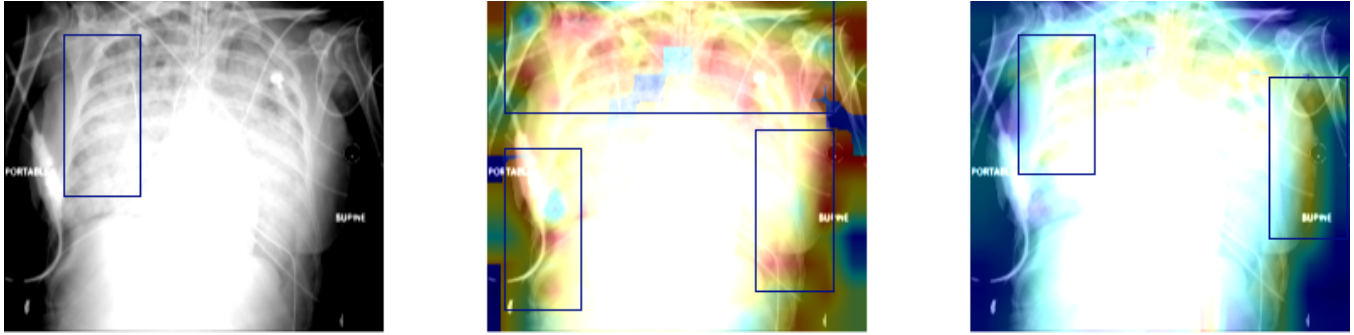

**Fig. 4.** Visualization of Attention Maps. The left figure is the original **Pneumonia** chest X-ray with a bounding box, and the middle figure and right figure are the attention maps of the final attention layer ResNetAtt and ResNetAttRadi, respectively.

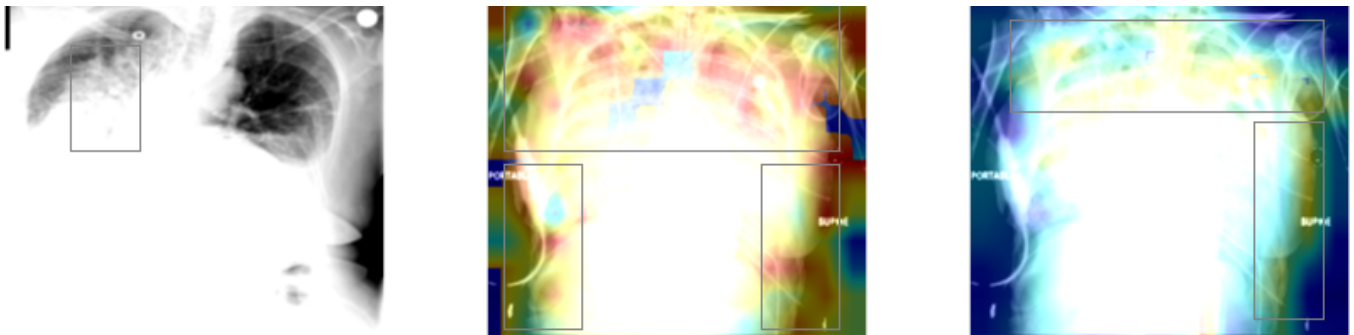

**Fig. 5.** Visualization of Attention Maps. The left figure is the original **Pneumonia** chest X-ray with a bounding box, and the middle figure and right figure are the attention maps of the final attention layer ResNetAtt and ResNetAttRadi, respectively.

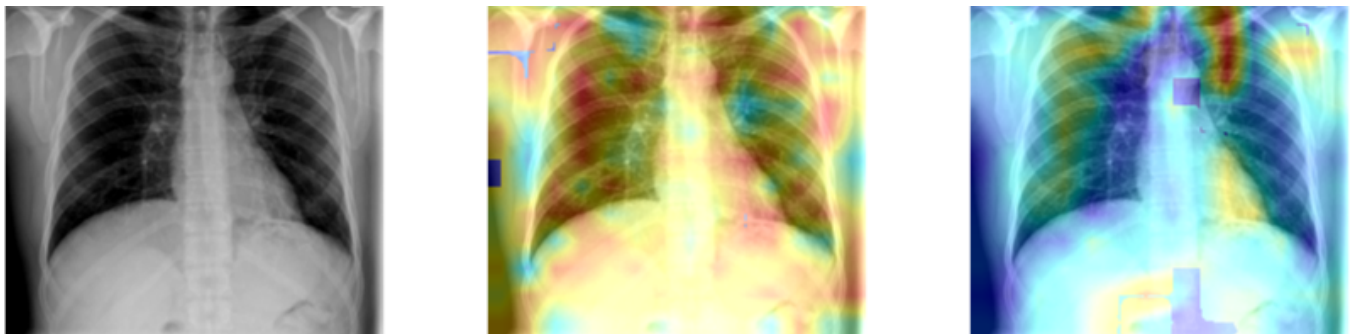

**Fig. 6.** Visualization of Attention Maps. The left figure is the original **Normal** chest X-ray, and the middle figure and right figure are the attention maps of the final attention layer ResNetAtt and ResNetAttRadi, respectively.

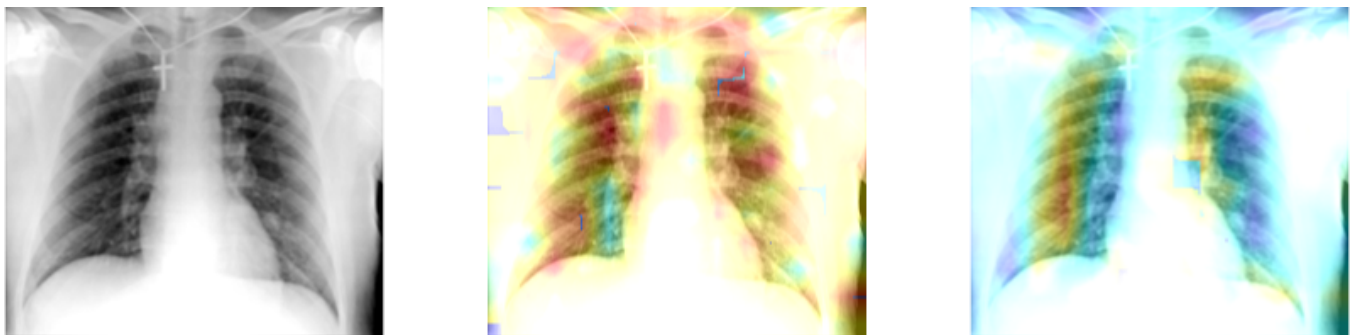

**Fig. 7.** Visualization of Attention Maps. The left figure is the original **Normal** chest X-ray, and the middle figure and right figure are the attention maps of the final attention layer ResNetAtt and ResNetAttRadi, respectively.
